# Supplementary material for: Exploring the Prognostic Value of Novel Markers in Adults With a Systemic Right Ventricle
Source: PubMed Central journal article supplement — J Am Heart Assoc. 2019 Aug 21;8(17):e013745. doi: 10.1161/JAHA.119.013745 (PMC6755830; doi:10.1161/jaha.119.013745), 2019-08-21
Supplement: JAH3-8-e013745-s001.pdf [file JAH3-8-e013745-s001.pdf]

## **SUPPLEMENTAL MATERIAL**

**Table S1. Standard deviations of variables included in univariable Cox regression, for interpretative purposes of standardized hazard ratios.**

|                                              | <b>Standard deviation</b> |
|----------------------------------------------|---------------------------|
| <b>Clinical variables</b>                    |                           |
| Age, years                                   | 9                         |
| Heart rate, beats/min                        | 13                        |
| Systolic blood pressure, mmHg                | 14                        |
| QRS duration, ms                             | 21                        |
| <b>Blood biomarkers</b>                      |                           |
|                                              | <i>(log)</i> ↓*           |
| NT-proBNP, pmol/L                            | 1.34                      |
| Hs-troponin-T, ng/L                          | 1.39                      |
| GDF-15, ng/L                                 | 0.77                      |
| Hs-CRP, mg/L                                 | 1.57                      |
| Galectin-3, ng/mL                            | 0.39                      |
| RDW, %                                       | 0.11                      |
| eGFR, mL/min/1.73m <sup>2</sup>              | 0.17                      |
| Hemoglobin, mmolFe/L                         | 0.15                      |
| <b>Echocardiographic markers</b>             |                           |
| <i>sRV dimensions</i>                        |                           |
| sRV end-diastolic annulus, mm/m <sup>2</sup> | 8.6                       |
| <i>Strain parameters</i>                     |                           |
| LS of the sRV free wall, %                   | 4.0                       |
| LS of the sRV septal wall, %                 | 3.3                       |
| GCS of the sRV, %                            | 3.8                       |
| <i>LV dimensions</i>                         |                           |
| LV end-diastolic diameter, mm/m <sup>2</sup> | 4.0                       |

\*Blood biomarkers were log transformed before standardization and therefore the SD's reported belong to the log transformed blood biomarker levels. CRP= C-reactive protein, eGFR= estimated glomerular filtration rate, GDF-15= growth differentiation factor-15, GCS= global circumferential strain, Hs= high sensitive, LS= longitudinal strain, LV= left ventricular, NT-proBNP= N-terminal pro b-type natriuretic peptide, RDW= red cell distribution width, sRV= systemic right ventr

**Table S2. Associations between clinical variables, blood- and echocardiographic markers and the primary- (death or heart failure) and secondary endpoint (death or arrhythmia), with adjustment for New York Heart Association functional class in adults with a systemic right ventricle.**

|                                        | Analysis with adjustment for NYHA functional class |           |         |                    |           |         |
|----------------------------------------|----------------------------------------------------|-----------|---------|--------------------|-----------|---------|
|                                        | Primary endpoint                                   |           |         | Secondary endpoint |           |         |
|                                        | HR*                                                | 95%CI     | p-value | HR*                | 95%CI     | p-value |
| <b>Clinical characteristics</b>        |                                                    |           |         |                    |           |         |
| Age                                    | 1.04                                               | 0.38-1.58 | 0.86    | 0.95               | 0.66-1.37 | 0.80    |
| Heart rate                             | 1.47                                               | 0.89-2.44 | 0.14    | 1.48               | 1.02-2.13 | 0.038   |
| Systolic blood pressure                | 0.65                                               | 0.39-1.09 | 0.10    | 0.55               | 0.35-0.87 | 0.009   |
| QRS duration                           | 1.23                                               | 0.80-1.91 | 0.35    | 1.30               | 0.92-1.83 | 0.13    |
| Loss of sinus rhythm                   | 2.16                                               | 0.85-5.56 | 0.11    | 1.61               | 0.75-3.47 | 0.23    |
| <b>Blood biomarkers</b>                |                                                    |           |         |                    |           |         |
| NT-proBNP                              | 1.79                                               | 1.15-2.80 | 0.010   | 1.08               | 0.73-1.61 | 0.70    |
| Hs-troponin-T                          | 1.70                                               | 1.03-2.78 | 0.036   | 1.40               | 0.96-2.03 | 0.08    |
| GDF-15                                 | 2.24                                               | 1.49-3.35 | <0.001  | 1.86               | 1.35-2.56 | <0.001  |
| Hs-CRP                                 | 2.02                                               | 1.18-3.44 | 0.010   | 1.38               | 0.92-2.06 | 0.12    |
| Galectin-3                             | 1.30                                               | 0.80-2.11 | 0.29    | 1.45               | 0.98-2.14 | 0.06    |
| RDW                                    | 1.91                                               | 1.38-2.65 | <0.001  | 1.71               | 1.26-2.31 | 0.001   |
| eGFR                                   | 0.73                                               | 0.52-1.03 | 0.07    | 0.72               | 0.53-0.97 | 0.032   |
| Hemoglobin                             | 0.52                                               | 0.36-0.73 | <0.001  | 0.72               | 0.53-1.00 | 0.047   |
| <b>Echocardiographic markers</b>       |                                                    |           |         |                    |           |         |
| Tricuspid regurgitation                | 1.74                                               | 1.11-2.74 | 0.016   | 1.23               | 0.85-1.79 | 0.28    |
| <i>sRV dimensions</i>                  |                                                    |           |         |                    |           |         |
| sRV end-diastolic annulus              | 1.66                                               | 0.97-2.86 | 0.07    | 0.94               | 0.62-1.40 | 0.74    |
| <i>Strain parameters</i>               |                                                    |           |         |                    |           |         |
| LS of the sRV free wall                | 1.19                                               | 0.73-1.94 | 0.50    | 1.06               | 0.71-1.58 | 0.74    |
| LS of the sRV septal wall              | 0.87                                               | 0.54-1.41 | 0.58    | 0.65               | 0.43-0.98 | 0.039   |
| GCS of the sRV <sup>†</sup>            | -‡                                                 | -         | -       | 0.64               | 0.42-0.98 | 0.038   |
| <i>LV dimensions</i>                   |                                                    |           |         |                    |           |         |
| LV end-diastolic diameter <sup>†</sup> | -‡                                                 | -         | -       | 1.41               | 0.98-2.04 | 0.07    |

\*Hazard ratios are expressed per increase in standard deviation for continuous variables. † In adult patients with transposition of the great arteries operated by the Mustard procedure only. ‡ Not enough power to perform multivariable analysis. CRP= C-reactive protein, eGFR= estimated glomerular filtration rate, GDF-15= growth differentiation factor-15, GCS= global circumferential strain, GLS= global longitudinal strain, Hs= high sensitive, LS= longitudinal strain, LV= left ventricular, NT-proBNP= N-terminal pro b-type natriuretic peptide, NYHA= New York Heart Association, RDW= red cell distribution width, sRV= systemic right ventricle

**Table S3. Associations between clinical variables, blood- and echocardiographic markers and the primary and secondary endpoint, restricted to adult patients with transposition of the great arteries operated by the Mustard procedure.**

|                                        | Mustard TGA patients (n=64) |            |         |                              |           |         |
|----------------------------------------|-----------------------------|------------|---------|------------------------------|-----------|---------|
|                                        | Primary endpoint<br>(n=15)  |            |         | Secondary endpoint<br>(n=22) |           |         |
|                                        | HR*                         | 95%CI      | p-value | HR*                          | 95%CI     | p-value |
| <b>Clinical variables</b>              |                             |            |         |                              |           |         |
| Age                                    | 2.54                        | 1.32-4.90  | 0.005   | 2.70                         | 1.48-4.93 | 0.001   |
| Heart rate                             | 1.48                        | 0.87-2.52  | 0.15    | 1.53                         | 1.03-2.28 | 0.036   |
| Systolic blood pressure                | 0.53                        | 0.30-0.93  | 0.027   | 0.46                         | 0.27-0.79 | 0.005   |
| NYHA >1                                | 5.25                        | 1.89-14.53 | 0.001   | 3.87                         | 1.62-9.27 | 0.002   |
| QRS duration                           | 1.53                        | 0.97-2.42  | 0.07    | 1.50                         | 1.02-2.20 | 0.042   |
| Loss of sinus rhythm                   | 3.53                        | 1.28-9.80  | 0.015   | 2.75                         | 1.15-6.62 | 0.023   |
| <b>Blood biomarkers</b>                |                             |            |         |                              |           |         |
| NT-proBNP                              | 2.85                        | 1.75-4.64  | <0.001  | 1.87                         | 1.24-2.83 | 0.003   |
| Hs-troponin-T                          | 2.58                        | 1.55-4.31  | <0.001  | 2.10                         | 1.40-3.32 | <0.001  |
| GDF-15                                 | 2.47                        | 1.61-3.78  | <0.001  | 2.81                         | 1.92-4.12 | <0.001  |
| Hs-CRP                                 | 2.31                        | 1.31-4.07  | 0.004   | 1.74                         | 1.13-2.68 | 0.012   |
| Galectin-3                             | 2.27                        | 1.31-3.93  | 0.003   | 2.50                         | 1.51-4.14 | <0.001  |
| RDW                                    | 2.07                        | 1.48-2.89  | <0.001  | 2.53                         | 1.64-4.04 | <0.001  |
| eGFR                                   | 0.60                        | 0.44-0.83  | 0.002   | 0.52                         | 0.37-0.74 | <0.001  |
| Hemoglobin                             | 0.49                        | 0.34-0.72  | <0.001  | 0.65                         | 0.44-0.96 | 0.030   |
| <b>Echocardiographic markers</b>       |                             |            |         |                              |           |         |
| Tricuspid regurgitation                | 1.60                        | 0.96-2.68  | 0.074   | 1.23                         | 0.78-1.95 | 0.38    |
| <i>sRV dimensions</i>                  |                             |            |         |                              |           |         |
| sRV end-diastolic annulus              | 2.00                        | 0.99-4.05  | 0.05    | 1.25                         | 0.68-2.31 | 0.47    |
| <i>Strain parameters</i>               |                             |            |         |                              |           |         |
| LS of the sRV free wall                | 0.62                        | 0.32-1.19  | 0.15    | 0.71                         | 0.42-1.20 | 0.20    |
| LS of the sRV septal wall              | 0.73                        | 0.44-1.22  | 0.23    | 0.62                         | 0.39-0.98 | 0.039   |
| GCS of the sRV                         | 0.77                        | 0.46-1.30  | 0.33    | 0.69                         | 0.46-1.05 | 0.09    |
| <i>LV dimensions</i>                   |                             |            |         |                              |           |         |
| LV end-diastolic diameter <sup>#</sup> | 1.95                        | 1.34-2.85  | 0.001   | 1.70                         | 1.21-2.38 | 0.002   |

\*Hazard ratios expressed per increase in standard deviation for continuous variables. <sup>#</sup>Indexed for body surface area. CRP= C-reactive protein, eGFR= estimated glomerular filtration rate, GDF-15= growth differentiation factor-15, GCS= global circumferential strain, Hs= high sensitive, LS= longitudinal strain, LV= left ventricular, NT-proBNP= N-terminal pro b-type natriuretic peptide, NYHA= New York Heart Association, RDW= red cell distribution width, sRV= systemic right ventricle

**Figure S1. Flowchart of the patient selection process of the prospective observational cohort study consisting of adults with a systemic right ventricle.**

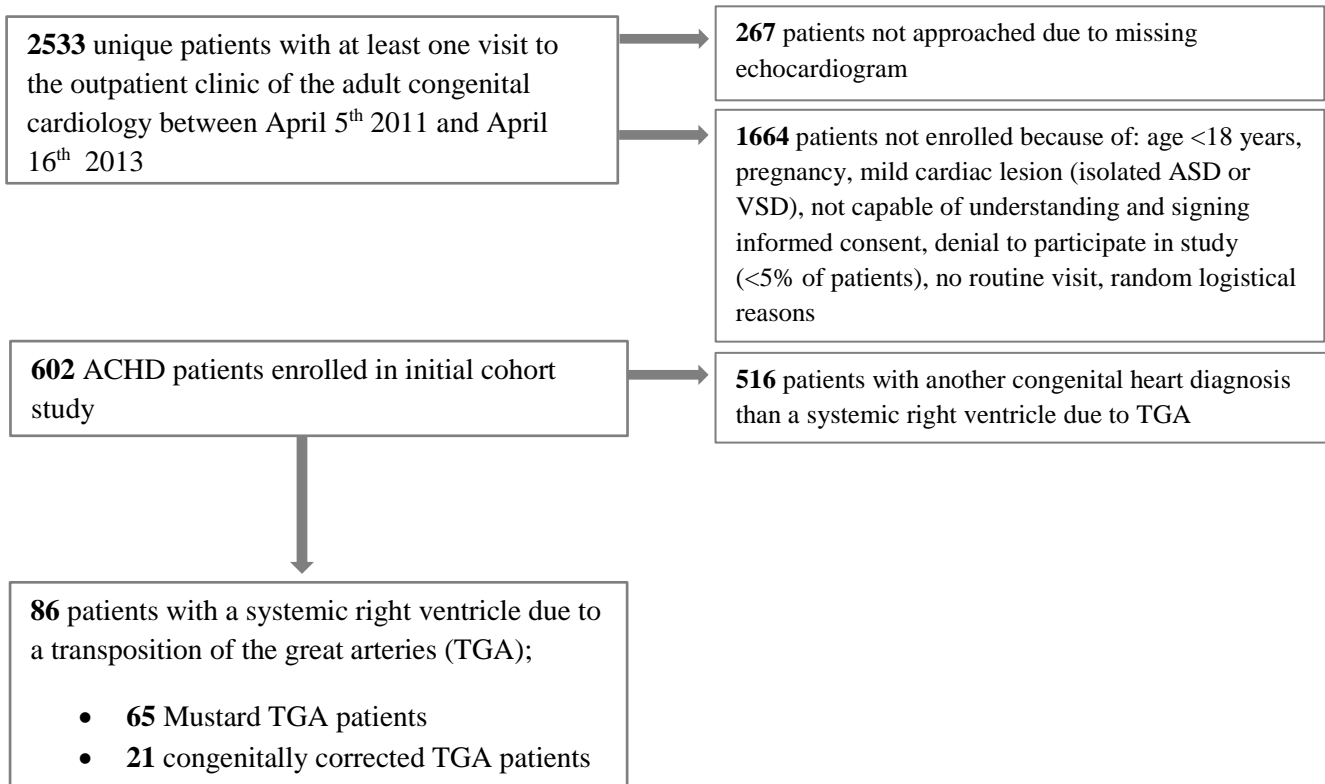

ASD= atrial septal defect, VSD= ventricular septal defect, ACHD= adult congenital heart disease, TGA= transposition of the great arteries
